# Supplementary material for: Sleep Reduction and Depressive Symptoms Synergistically Increase Cancer Risk in Middle-Aged and Older Chinese Adults: Evidence from the CHARLS Cohort
Source: Research Square preprint supplement (doi:10.21203/rs.3.rs-7503440/v1), 2025-10-17
Supplement: Supplementary file 1 [file 761d9ed9fa1fbc66c747b0d9.docx]

Supplementary Table 1: Sensitivity analysis of the association between sleep duration and cancer risk under different models

| **Model** | **HR ( sleep duration)** | **95% CI** | **p-value** |
| --- | --- | --- | --- |
| Unadjusted | 1.32 | 1.09, 1.60 | 0.005 |
| Adjusted (full covariates)* | 1.33 | 1.03, 1.73 | 0.030 |
| Adjusted (except for hypertension and diabetes )* | 1.29 | 1.00, 1.68 | 0.051 |
| Adjusted (except for BMI)* | 1.31 | 1.02, 1.67 | 0.033 |
| Adjusted (except for Drinking and Smoking)* | 1.33 | 1.03, 1.73 | 0.031 |
| Adjusted (minimal covariates)* | 1.29 | 1.07, 1.57 | 0.009 |
| Adjusted (full covariates)*: adjusted for Gender, Marry, Place of residence, Drinking, Smoking, Age, Education, Hypertension, Diabetes, Income, and BMI.  Adjusted (except for hypertension and diabetes )*: adjusted for full covariates except for hypertension and diabetes.  Adjusted (except for BMI)*: adjusted for full covariates except for BMI.  Adjusted (minimal covariates)*: adjusted for Gender, Age, Marry, and Place of residence. | | | |

Supplementary Table 2：Sensitivity analysis of the association between depression symptoms and cancer risk under different models

| **Model** | **HR (Moderate to severe depression)** | **95% CI** | **p-value** |
| --- | --- | --- | --- |
| Unadjusted | 1.32 | 1.03, 1.69 | 0.026 |
| Adjusted (full covariates)* | 1.49 | 1.08, 2.07 | 0.016 |
| Adjusted (except for hypertension and diabetes )* | 1.53 | 1.11, 2.12 | 0.010 |
| Adjusted (except for BMI)* | 1.39 | 1.02, 1.89 | 0.036 |
| Adjusted (except for Drinking and Smoking)* | 1.50 | 1.08, 2.08 | 0.016 |
| Adjusted (minimal covariates)* | 1.30 | 1.01, 1.67 | 0.038 |
| Adjusted (full covariates)*: adjusted for Gender, Marry, Place of residence, Drinking, Smoking, Age, Education, Hypertension, Diabetes, Income, and BMI.  Adjusted (except for hypertension and diabetes )*: adjusted for full covariates except for hypertension and diabetes.  Adjusted (except for BMI)*: adjusted for full covariates except for BMI.  Adjusted (minimal covariates)*: adjusted for Gender, Age, Marry, and Place of residence. | | | |

Supplementary Table 3：Sensitivity analysis of the association between sleep duration and cancer risk after multiple imputation

| **Characteristic** | **N** | **Event N** | **HR** | **95% CI** | **p-value** |
| --- | --- | --- | --- | --- | --- |
| Sleep duration (unadjusted) |  |  |  |  |  |
| ˃ 6 (Normal sleep) | 7,117 | 182 | Reference | Reference |  |
| ≤ 6 (Sleep reduction) | 7,232 | 236 | 1.32 | 1.09, 1.60 | 0.005 |
| Sleep duration (adjusted)* |  |  |  |  |  |
| ˃ 6 (Normal sleep) | 7,117 | 182 | Reference | Reference |  |
| ≤ 6 (Sleep reduction) | 7,232 | 236 | 1.31 | 1.08, 1.59 | 0.007 |
| Abbreviations: CI = Confidence Interval, HR = Hazard Ratio | | | | | |
| * adjusted for Gender, Marry, Place of residence, Drinking, Smoking, Age, Education, Hypertension, Diabetes, Income, and BMI | | | | | |

Supplementary Table 4：Sensitivity analysis of the association between depression symptoms and cancer risk after multiple imputation

| **Characteristic** | **N** | **Event N** | **HR** | **95% CI** | **p-value** |
| --- | --- | --- | --- | --- | --- |
| CESD-10 (unadjusted) |  |  |  |  |  |
| ˂ 10 (No depression) | 9,064 | 247 | Reference | Reference |  |
| 10 - 15 (Mild depression) | 2,811 | 84 | 1.11 | 0.87, 1.42 | 0.412 |
| ≥ 15 (Moderate to severe depression) | 2,474 | 87 | 1.32 | 1.03, 1.69 | 0.026 |
| CESD-10 (adjusted)* |  |  |  |  |  |
| ˂ 10 (No depression) | 9,064 | 247 | Reference | Reference |  |
| 10 - 15 (Mild depression) | 2,811 | 84 | 1.11 | 0.87, 1.44 | 0.401 |
| ≥ 15 (Moderate to severe depression) | 2,474 | 87 | 1.33 | 1.03, 1.73 | 0.029 |
| Abbreviations: CI = Confidence Interval, HR = Hazard Ratio | | | | | |
| * adjusted for Gender, Marry, Place of residence, Drinking, Smoking, Age, Education, Hypertension, Diabetes, Income, and BMI | | | | | |

Supplementary Table 5：Sensitivity analysis of the association between sleep duration and cancer risk after excluding potential cancer participants

| **Characteristic** | **N** | **Event N** | **HR** | **95% CI** | **p-value** |
| --- | --- | --- | --- | --- | --- |
| Sleep duration (unadjusted) |  |  |  |  |  |
| ˃ 6 (Normal sleep) | 7,094 | 159 | Reference | Reference |  |
| ≤ 6 (Sleep reduction) | 7,217 | 221 | 1.42 | 1.15, 1.74 | <0.001 |
| Sleep duration (adjusted)* |  |  |  |  |  |
| ˃ 6 (Normal sleep) | 3,615 | 83 | Reference | Reference |  |
| ≤ 6 (Sleep reduction) | 4,037 | 128 | 1.42 | 1.08, 1.88 | 0.012 |
| Abbreviations: CI = Confidence Interval, HR = Hazard Ratio | | | | | |
| * adjusted for Gender, Marry, Place of residence, Drinking, Smoking, Age, Education, Hypertension, Diabetes, Income, and BMI | | | | | |

Supplementary Table 6：Sensitivity analysis of the association between depression symptoms and cancer risk after excluding potential cancer participants

| **Characteristic** | **N** | **Event N** | **HR** | **95% CI** | **p-value** |
| --- | --- | --- | --- | --- | --- |
| CESD-10 (unadjusted) |  |  |  |  |  |
| ˂ 10 (No depression) | 9,040 | 223 | Reference | Reference |  |
| 10 - 15 (Mild depression) | 2,804 | 77 | 1.13 | 0.87, 1.46 | 0.366 |
| ≥ 15 (Moderate to severe depression) | 2,467 | 80 | 1.35 | 1.04, 1.74 | 0.022 |
| CESD-10 (adjusted)* |  |  |  |  |  |
| ˂ 10 (No depression) | 4,581 | 116 | Reference | Reference |  |
| 10 - 15 (Mild depression) | 1,603 | 45 | 1.14 | 0.81, 1.62 | 0.455 |
| ≥ 15 (Moderate to severe depression) | 1,468 | 50 | 1.48 | 1.05, 2.09 | 0.027 |
| Abbreviations: CI = Confidence Interval, HR = Hazard Ratio | | | | | |
| * adjusted for Gender, Marry, Place of residence, Drinking, Smoking, Age, Education, Hypertension, Diabetes, Income, and BMI | | | | | |
